# Supplementary material for: Liver Med23 ablation improves glucose and lipid metabolism through modulating FOXO1 activity
Source: PubMed Central journal article supplement — Cell Res. 2014 Sep 16;24(10):1250–65. doi: 10.1038/cr.2014.120 (PMC4185346; doi:10.1038/cr.2014.120), 2014-09-16
Supplement: cr2014120x1.pdf [file cr2014120x1.pdf]

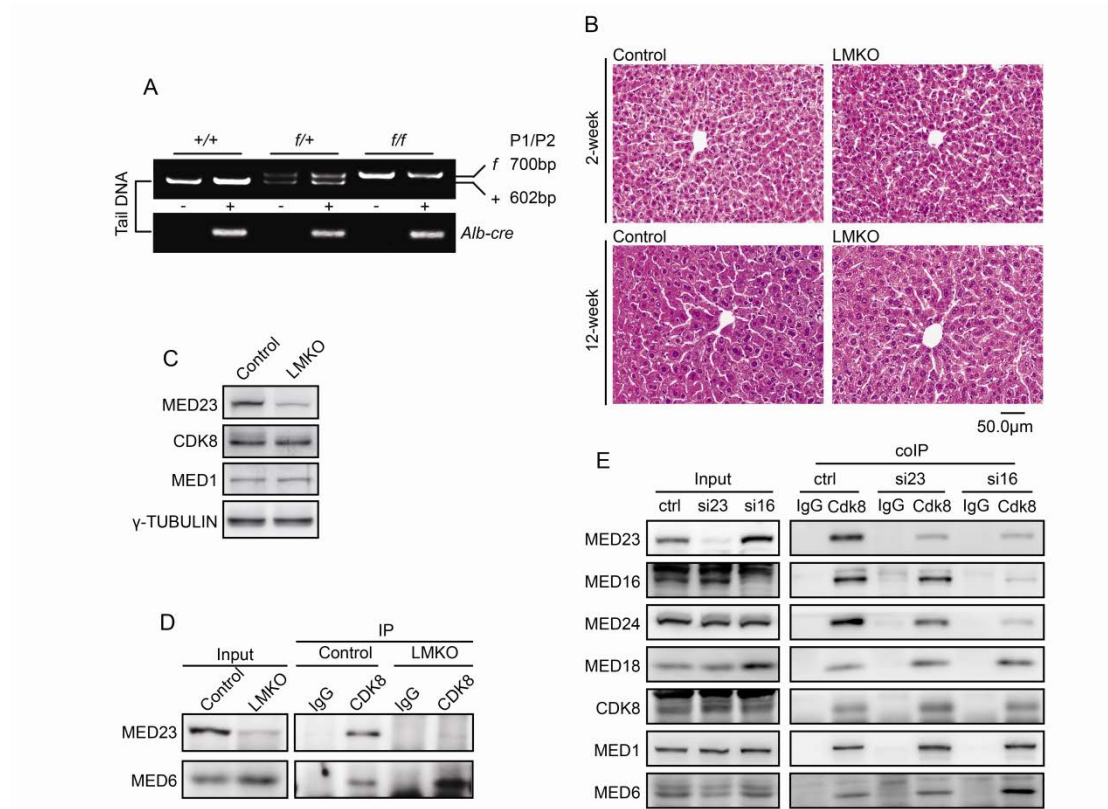

**Figure S1** Characterization of LMKO mice and the Mediator complex with *Med23* deletion.

(A) Upper panel: PCR genotyping of mouse tail DNA with primers indicated in Figure 1A. '+' being a wild type allele and 'f' being a floxed allele; lower panel: PCR of mouse tail DNA with primers identifying *Albumin-Cre* recombinase (*Alb-cre*). (B) Histology analysis of livers from control and LMKO mice. Hematoxylin and eosin (H&E) staining of liver sections from control and LMKO mice at 2-week and 12-week old. (C) Immunoblot analysis of MED23, CDK8 and MED1 expression in livers from control and LMKO mice at 2-week old. (D) co-IP using anti-CDK8 antibody in livers of control and LMKO mice at 2-week old, blotting with antibodies to MED23 and MED6. (E) co-IP of Mediator with anti-CDK8 antibody in siCtrl (ctrl), si-*Med23* (si23) and si-*Med16* (si16) AML12 hepatocytes.
