# Supplementary material for: Liver Med23 ablation improves glucose and lipid metabolism through modulating FOXO1 activity
Source: PubMed Central journal article supplement — Cell Res. 2014 Sep 16;24(10):1250–65. doi: 10.1038/cr.2014.120 (PMC4185346; doi:10.1038/cr.2014.120), 2014-09-16
Supplement: cr2014120x3.pdf [file cr2014120x3.pdf]

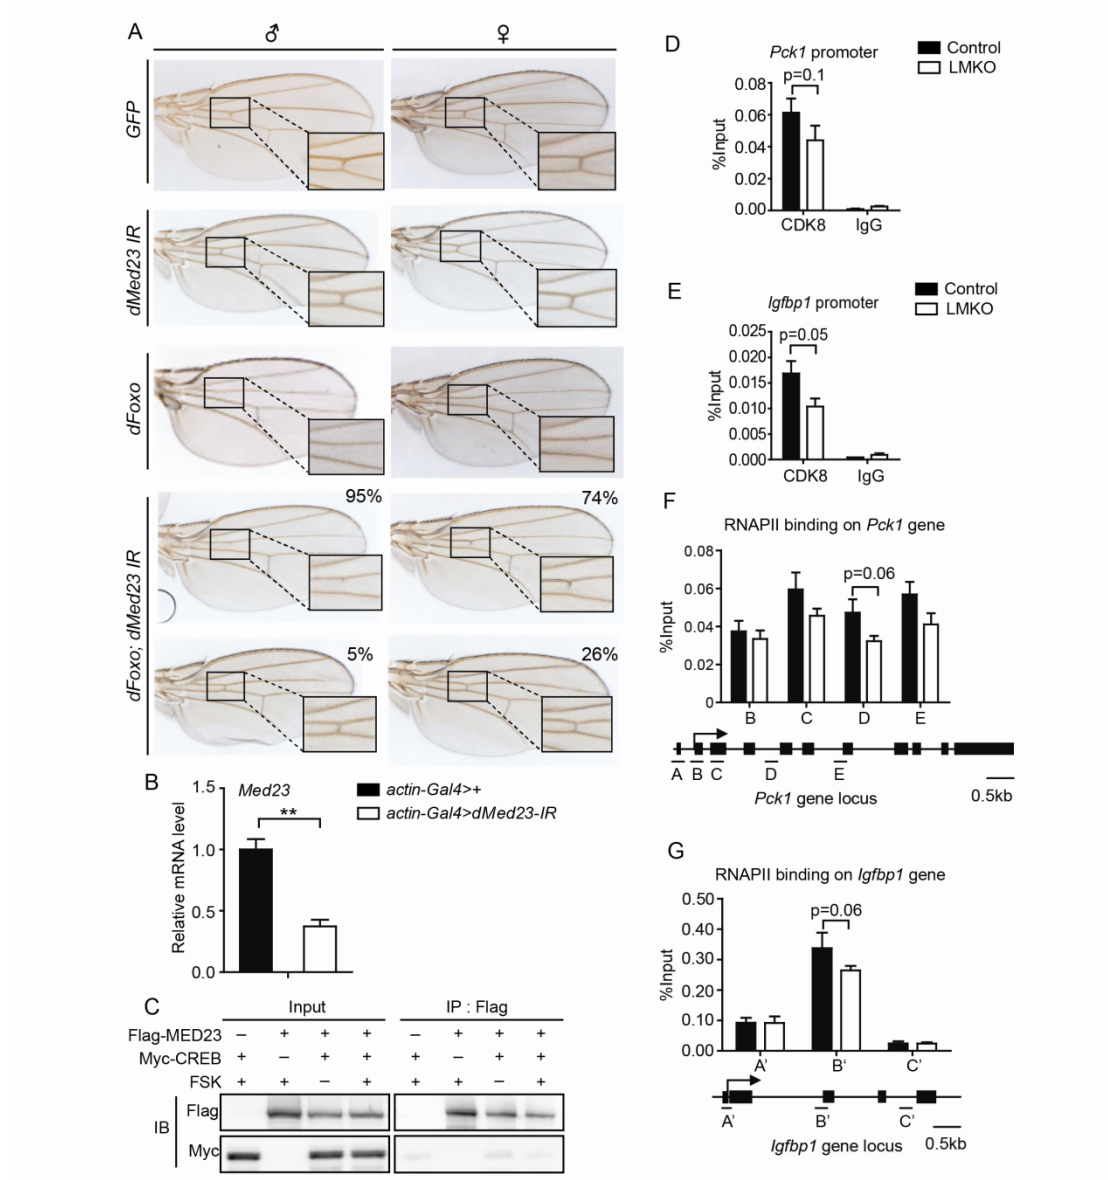

**Figure S3** Mediator MED23 functions as a cofactor of FOXO in *Drosophila* and in mice livers. **(A)** The effects of *dFOXO* over-expression and/or *MED23* knockdown by *dpp-Gal4* on anterior crossvein formation in the wing in *Drosophila*. **(B)** Knockdown efficiency of *MED23* was measured by Q-PCR in *Drosophila*. **(C)** Co-IP of overexpressed Flag-tagged *MED23* and Myc-tagged *CREB* in 293T cells. **(D-E)** Chromatin immunoprecipitation (ChIP) assay shows the binding of *CDK8* at the promoter of *Pck1* **(D)** and *Igfbp1* **(E)**. IgG was employed as a negative control. **(F-G)** ChIP assay shows RNA polymerase II (RNAPII) binding on *Pck1* **(F)** and *Igfbp1* gene **(G)**. The scheme shows primers used for Q-PCR, in each case.

For panels **B**, and **D** to **G**, data are presented as mean  $\pm$  s.e.m.  $**P < 0.01$ , *versus* control by Student's two-tailed  $t$  test. For all the panels, absence of \* or numbers indicates that the statistical analysis were non-significant.
