# Supplementary material for: Liver Med23 ablation improves glucose and lipid metabolism through modulating FOXO1 activity
Source: PubMed Central journal article supplement — Cell Res. 2014 Sep 16;24(10):1250–65. doi: 10.1038/cr.2014.120 (PMC4185346; doi:10.1038/cr.2014.120), 2014-09-16
Supplement: cr2014120x5.pdf [file cr2014120x5.pdf]

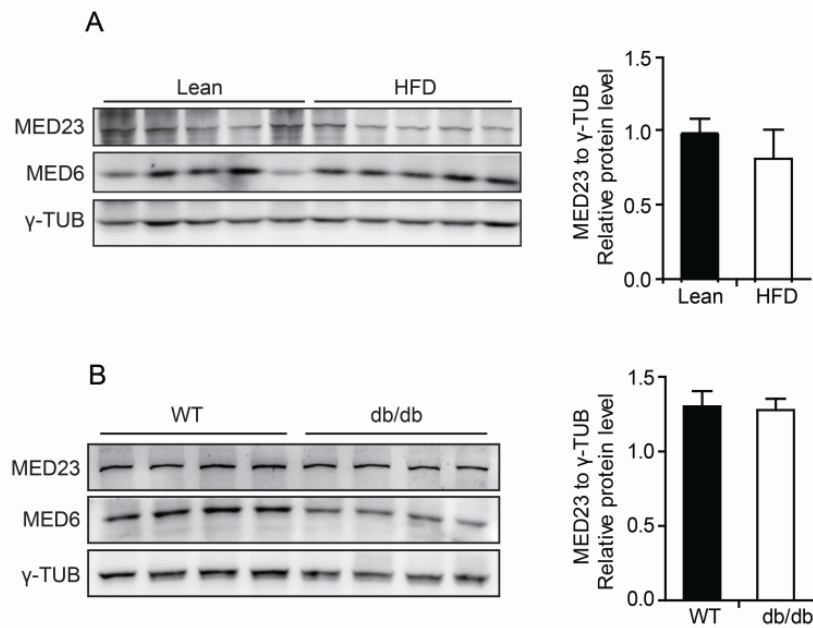

**Figure S5** Analysis of MED23 levels in disease mice model. **(A)** Immunoblot of MED23 in livers of C57BL/6 mice fed on chow diet or HFD (left panel). Densitometric analysis (right panel). **(B)** Immunoblot of MED23 in livers of lean (control) and *db/db* mice (left panel). Densitometric analysis (right panel). Data are presented as mean  $\pm$  s.e.m.. For all the panels, absence of \* indicates that the statistical analysis were non-significant.
