# Supplementary material for: Liver Med23 ablation improves glucose and lipid metabolism through modulating FOXO1 activity
Source: PubMed Central journal article supplement — Cell Res. 2014 Sep 16;24(10):1250–65. doi: 10.1038/cr.2014.120 (PMC4185346; doi:10.1038/cr.2014.120), 2014-09-16
Supplement: cr2014120x7.pdf [file cr2014120x7.pdf]

**Table S2** General characteristics from control and LMKO mice after 8 weeks under HFD

| <b>Variable</b>   | <b>Unit</b>         | <b>control</b> | <b>LMKO</b>   |
|-------------------|---------------------|----------------|---------------|
| body weight       | g                   | 27.81 ± 1.33   | 22.27 ± 1.13* |
| liver weight      | g                   | 0.83 ± 0.07    | 0.62 ± 0.02*  |
| liver/body        | %                   | 3.00 ± 0.13    | 2.77 ± 0.08   |
| Fat mass          | g                   | 8.11 ± 0.77    | 5.76 ± 0.74*  |
| Fat mass/BW       | %                   | 27.02 ± 2.10   | 20.98 ± 2.28  |
| Lean mass         | g                   | 17.14 ± 0.46   | 17.40 ± 0.61  |
| Lean mass/BW      | %                   | 57.87 ± 1.90   | 64.30 ± 2.30* |
| ALT               | U L <sup>-1</sup>   | 30.83 ± 5.03   | 37.60 ± 10.20 |
| AST               | U L <sup>-1</sup>   | 233.50 ± 67.2  | 188.20 ± 9.9  |
| Albumin           | g L <sup>-1</sup>   | 30.67 ± 0.80   | 31.00 ± 0.00  |
| NEFA              | mEq L <sup>-1</sup> | 0.92 ± 0.09    | 0.98 ± 0.10   |
| Fasted liver Chol | mg g <sup>-1</sup>  | 1.89 ± 0.19    | 1.96 ± 0.22   |
| Fasted liver TG   | mg g <sup>-1</sup>  | 18.35 ± 2.08   | 20.38 ± 2.58  |
| Fasted liver NEFA | μEq g <sup>-1</sup> | 2.57 ± 0.30    | 2.47 ± 0.19   |
| Adiponectin       | μg ml <sup>-1</sup> | 27.05 ± 2.69   | 27.02 ± 2.74  |
| Leptin            | pg ml <sup>-1</sup> | 371.7 ± 144.2  | 285.5 ± 125.8 |
| Refed NEFA        | mEq L <sup>-1</sup> | 0.85 ± 0.08    | 0.67 ± 0.16   |
| Refed liver Chol  | mg g <sup>-1</sup>  | 1.93 ± 0.10    | 2.02 ± 0.07   |
| Refed liver TG    | mg g <sup>-1</sup>  | 18.69 ± 4.53   | 20.97 ± 4.64  |
| Refed liver NEFA  | μEq g <sup>-1</sup> | 1.63 ± 0.02    | 2.02 ± 0.17   |

High fat diet (HFD), Body weight (BW), Non-Esterified Fatty Acids (NEFA), Alanine aminotransferase (ALT), Aspartate aminotransferase (AST), Cholesterol (Chol), Triglycerides (TG). n = 8 or 9 per group. All data were obtained from overnight-fasted mice, unless indicated. Data were presented as mean  $\pm$  s.e.m. \* $P < 0.05$ .
